# Supplementary material for: Preparation of bismuth-doped CsPbBr 3 perovskite single crystals for X-ray and gamma-ray sensing applications
Source: Royal Society of Chemistry journal article supplement (doi:10.1039/d4ma00455h), 2024-01-01
Supplement: d4ma00455h1.pdf [file d4ma00455h1.pdf]

## Electronic supplementary Information (ESI)

### Preparation of Bismuth-doped CsPbBr<sub>3</sub> Perovskite Single Crystal for X-ray and Gamma-ray sensing Application

Premkumar Sellan,<sup>a\*</sup> Manigandan Selvan,<sup>b</sup> Abida Perveen,<sup>a</sup> Din Nasrud,<sup>a</sup> Sakthivel Chandrasekar,<sup>c</sup> Pitchaikannu Venkatraman,<sup>d</sup> Devaraj Nataraj,<sup>b</sup> Byung Seong Bae,<sup>e</sup> Damian Chinedu Onwudiwe,<sup>f</sup> Lei Wei<sup>a\*</sup>

---

<sup>a</sup>Joint International Research Laboratory of Information Display and Visualization, School of Electronic Science and Technology, Southeast University, Nanjing, 210096, P. R. China. [lw@seu.edu.cn](mailto:lw@seu.edu.cn), [sivajisro@gmail.com](mailto:sivajisro@gmail.com)

<sup>b</sup>Quantum Materials & Devices Laboratory, Department of Physics, Bharathiar University, Coimbatore, Tamil Nadu 641046, India.

<sup>c</sup>Laboratory of Functional Molecules and Materials, School of Physics and Optoelectronic Engineering, Shandong University of Technology, Zibo, China.

<sup>d</sup>Radiotherapy & Radiation Medicine, IMS, Banaras Hindu University, Varanasi, India.

<sup>e</sup>Department of Electronics & Display Engineering Hoseo University, Asan city, Chungnam 31499, Republic of Korea.

<sup>f</sup>Department of Chemistry, School of Mathematics and Physical Sciences, Faculty of Natural and Agricultural Sciences North-West University Mafikeng Campus, Mmabatho 2735, South Africa.

---

| <b>S.No</b> | <b>Content</b>                                                                                                                                                                                                                                                                                                                                                                   | <b>Page. No</b> |
|-------------|----------------------------------------------------------------------------------------------------------------------------------------------------------------------------------------------------------------------------------------------------------------------------------------------------------------------------------------------------------------------------------|-----------------|
| 1.          | Figure. S1. Schematic representation of Bismuth doped on the surface of the CsPbBr <sub>3</sub> single crystal by spin coating process.                                                                                                                                                                                                                                          | 3               |
| 2.          | Figure. S2 Bandgap energies obtained as a function of Tauc plot analysis from absorbance, the calculated band gap values are 2.46 and 2.41 eV for the pure CsPbBr <sub>3</sub> and Bi-doped CsPbBr <sub>3</sub> single crystal samples, respectively.<br>Table. 1 TCSPC lifetime values of the pure CsPbBr <sub>3</sub> and Bi-doped CsPbBr <sub>3</sub> single crystal samples. | 4               |
| 3.          | Figure S3. Schematic representation of Bi-doped CsPbBr <sub>3</sub> perovskite-based thin film photodetector fabrication.                                                                                                                                                                                                                                                        | 5               |
| 4.          | Figure. S4. (a) Room-temperature X-ray diffraction pattern of CsPbBr <sub>3</sub> and Bi-doped CsPbBr <sub>3</sub> single crystal thinfilm samples coated on FTO substrate.                                                                                                                                                                                                      | 6               |
| 5.          | Figure S5. Time-dependent photocurrent spectra of Bi-doped CsPbBr <sub>3</sub> thin-film photodetectors at bias 5V and 2V under different wavelength LED source 470 nm and 530 nm (The LED source intensity with 0.3 A input power).                                                                                                                                             | 7               |
| 6.          | Table 2 Calculated value of the responsivity of the Bi-doped CsPbBr <sub>3</sub> thin film sample at 5v bias.                                                                                                                                                                                                                                                                    | 8               |
|             |                                                                                                                                                                                                                                                                                                                                                                                  |                 |

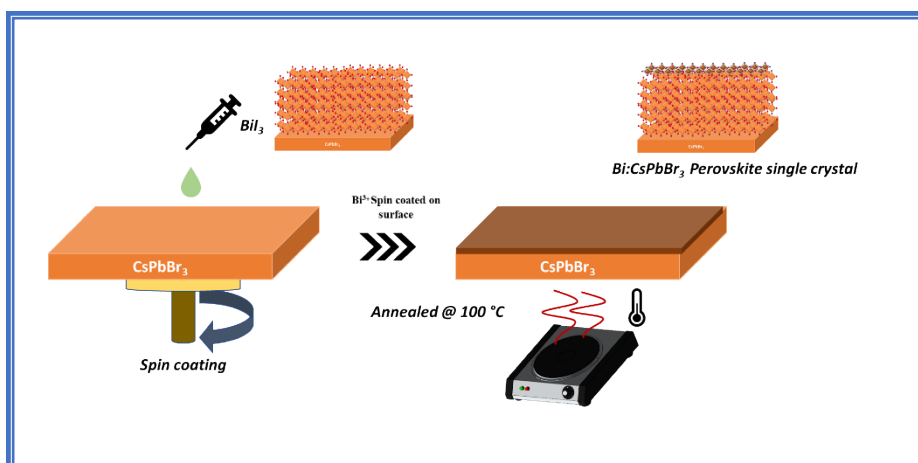

**Figure. S1.** Schematic representation of Bismuth doped on the surface of the CsPbBr<sub>3</sub> single crystal by spin coating process.

In this work, based on precursor engineering, we developed a two-step solution process to prepare the bismuth-doped CsPbBr<sub>3</sub> single crystal. The top of the BiI<sub>3</sub> layer was coated on top of the CsPbBr<sub>3</sub> single crystals surface by spin coating (0.2mM BiI<sub>3</sub> solution was prepared by dissolving in 1ml of DMF) solution was used to by spin coating, 800 rpm @ 10 sec, repeated two times after that, dried under a vacuum Oven at 100 °C for 6 hours. This allowed partial cation exchange on the single crystal surface. Also, I<sub>3</sub> has a weak field ligand compared to Br<sub>3</sub>, which makes it difficult to replace the Br<sub>3</sub> atoms in the pure CsPbBr<sub>3</sub> single crystal.

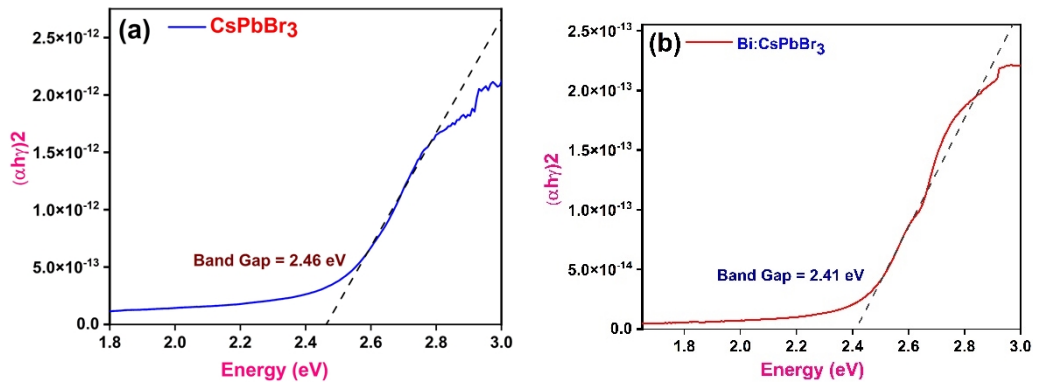

Figure.  
S2

Bandgap energies obtained as a function of Tauc plot analysis from absorbance, the calculated band gap values are 2.46 and 2.41 eV for the pure CsPbBr<sub>3</sub> and Bi-doped CsPbBr<sub>3</sub> single crystal samples, respectively.

| Samples                      | $\tau_1$<br>(Sec)                     | $\tau_2$<br>(Sec)                     | Avg. Lifetime<br>$\tau$ (ns) |
|------------------------------|---------------------------------------|---------------------------------------|------------------------------|
| CsPbBr <sub>3</sub>          | 6.98 X 10 <sup>-10</sup><br>[84.08 %] | 4.342 X 10 <sup>-9</sup><br>[15.92 %] | 2.67 X10 <sup>-9</sup>       |
| Bi-doped CsPbBr <sub>3</sub> | 7.11 X10 <sup>-10</sup><br>[89.57 %]  | 4.14 x10 <sup>-9</sup><br>[10.43 %]   | 2.25 X10 <sup>-9</sup>       |

**Table. 1** TCSPC lifetime values of the pure CsPbBr<sub>3</sub> and Bi-doped CsPbBr<sub>3</sub> single crystal samples respectively.

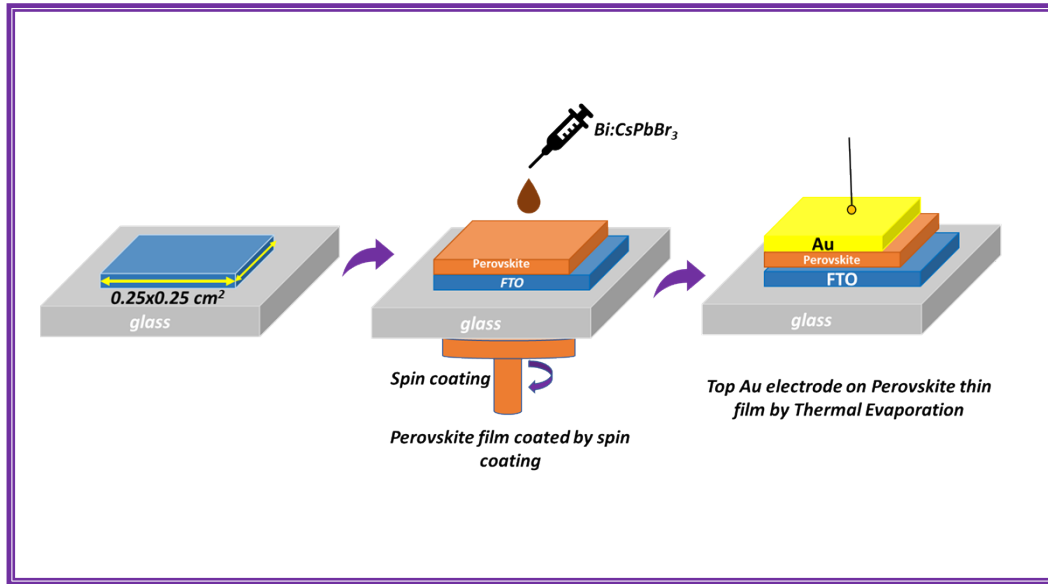

**Figure S3.** Schematic representation of Bi-doped CsPbBr<sub>3</sub> perovskite-based thin film photodetector fabrication.

We fabricated Bi-doped CsPbBr<sub>3</sub> thin films by using single crystals dispersed in DMSO and spin-coated on an FTO substrate. were used in photodetectors with FTO/Bi-doped CsPbBr<sub>3</sub> /Au device structure. Different layers of the device were deposited on the pre-cleaned FTO-coated glass slides. The Bi-doped CsPbBr<sub>3</sub> (photosensitizer) single crystals were dispersed in DMSO: DMF. After that, the solution was deposited by spin coating method over the FTO with 800 rpm at 20 seconds, repeated at two times, and dried at ambient temperature for 3 hrs. Au top electrodes was deposited (electrode area (0.25x0.25 cm<sub>2</sub>)) by using thermal evaporation method. The constructed devices were subjected to photocurrent measurements.

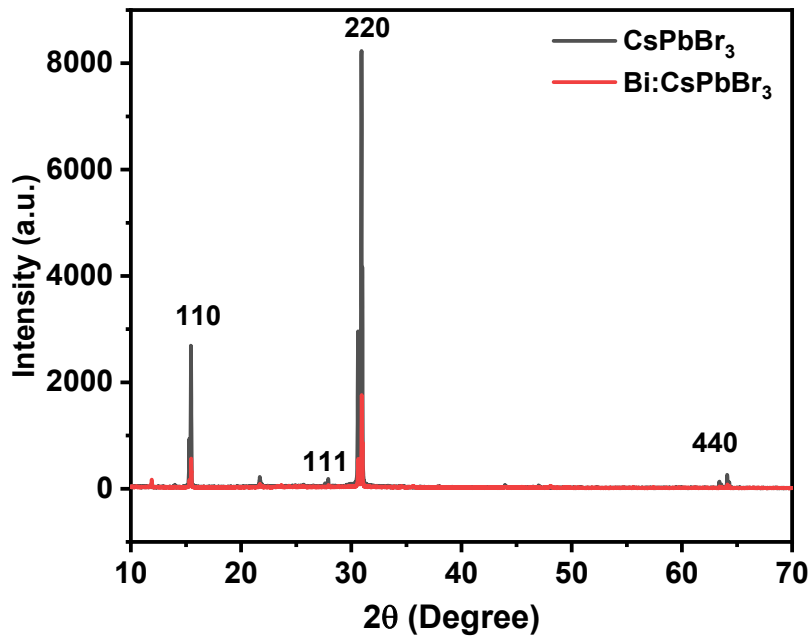

**Figure. S4.** (a) Room-temperature X-ray diffraction pattern of CsPbBr<sub>3</sub> and Bi-doped CsPbBr<sub>3</sub> single crystal thinfilm samples coated on FTO substrate.

The XRD characterization explores the structural authentication of thinfilm, crystallographic planes, and crystallinity. The powder XRD patterns of synthesised pure CsPbBr<sub>3</sub> and Bi-doped CsPbBr<sub>3</sub> perovskite thin film coated on FTO substrate are shown in **Fig. S4**. As a result, the  $2\theta$  peaks were found to be 15.46°, 27.31°, 30.93°, and 64.11° and corresponding planes of (110), (111), (220), and (440) for both CsPbBr<sub>3</sub> and Bi-doped CsPbBr<sub>3</sub> single crystal thin films samples, which are in good agreement with a single crystal. The CsPbBr<sub>3</sub> perovskite thin films exhibit an orthorhombic structure (ICSD 97851) with the Pnma space group, and there is no phase change occurring in the thin film formation.

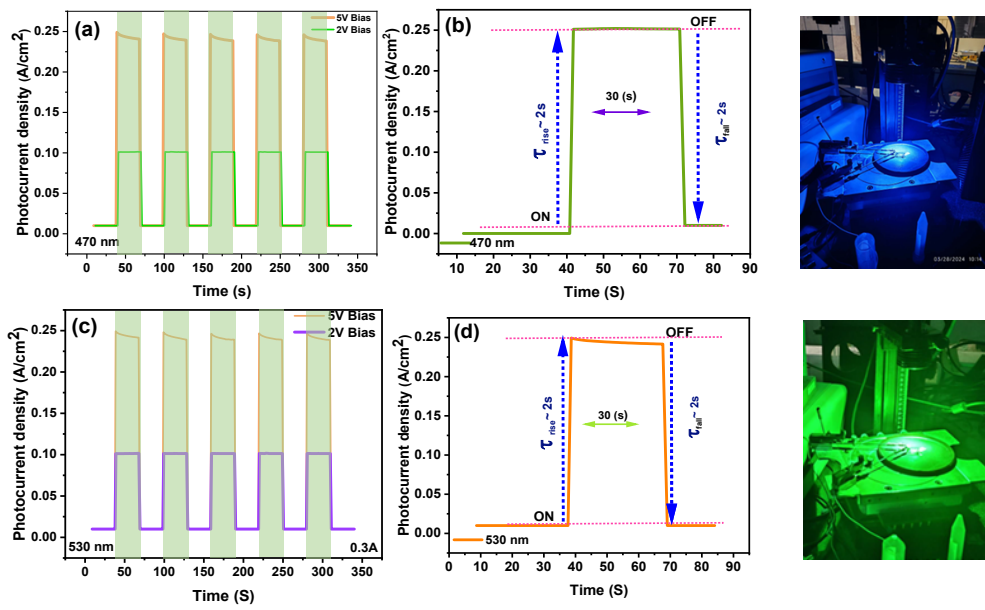

**Figure S5.** Time-dependent photocurrent spectra of Bi-doped  $\text{CsPbBr}_3$  thin-film photodetectors at bias 5V and 2V under different wavelength LED source 470 nm and 530 nm (The LED source intensity with 0.3 A input power).



The photoresponsivity (R) is the ratio of the photogenerated current density to that incident light (at given wavelength)  $\lambda \sim 470$  nm and 530 nm.

$$R = \frac{\Delta I}{PA}$$

Where  $\Delta I$  is the corresponding change in dark and illuminated current and P is the light's power density (or illumination intensity). The value of the responsivity is calculated for the photodetector at two different wavelength and tabulated in Table.1

| S.No | Wavelength (nm) | $I_{ON}/I_{OFF}$ ratio | Responsivity (mA/W) |
|------|-----------------|------------------------|---------------------|
| 1.   | 470             | 596                    | 0.35                |
| 2.   | 530             | 24                     | 0.25                |

**Table. 2** Calculated value of the responsivity of the Bi-doped CsPbBr<sub>3</sub> thin film sample at 5v bias.
